# Supplementary material for: The Host-Specific Intestinal Microbiota Composition Impacts Campylobacter coli Infection in a Clinical Mouse Model of Campylobacteriosis
Source: MDPI journal article supplement (doi:10.3390/pathogens9100804), 2020-09-29

**A**

# Histopathology (H&E) - COLON

**Mock  
Murine**

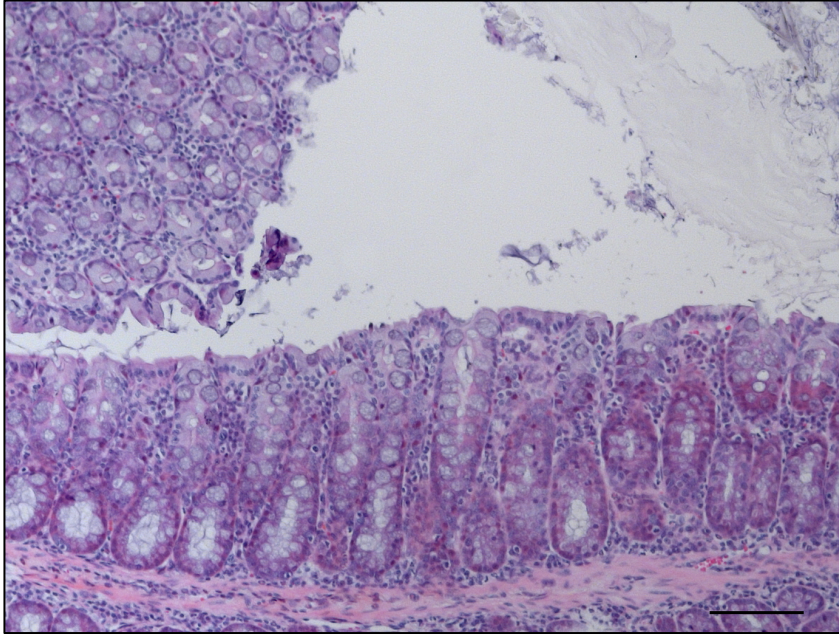

***C. coli*  
Murine**

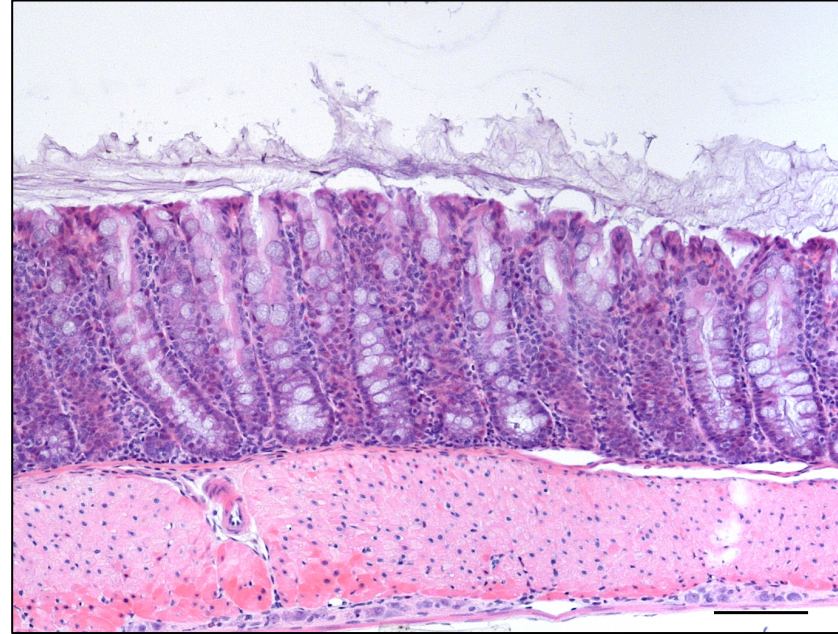

**Mock  
Human**

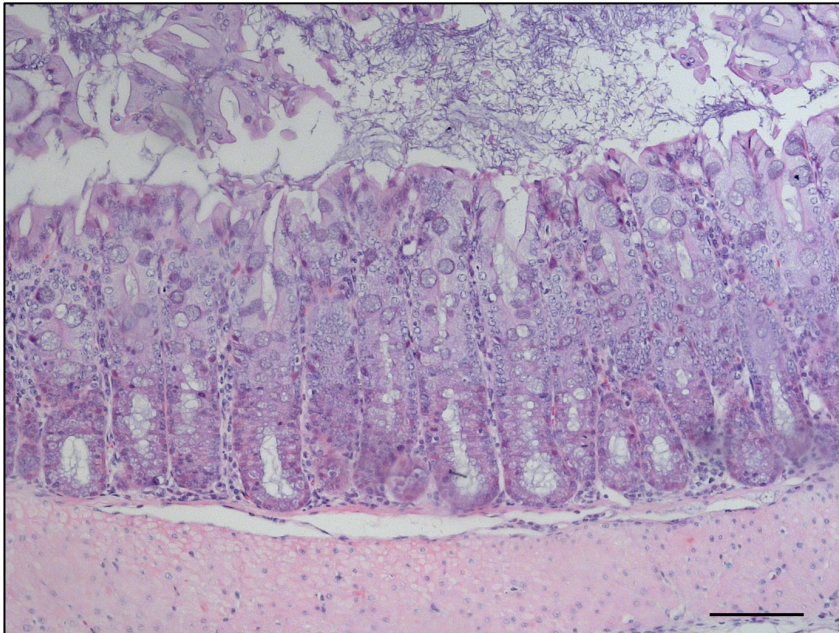

***C. coli*  
Human**

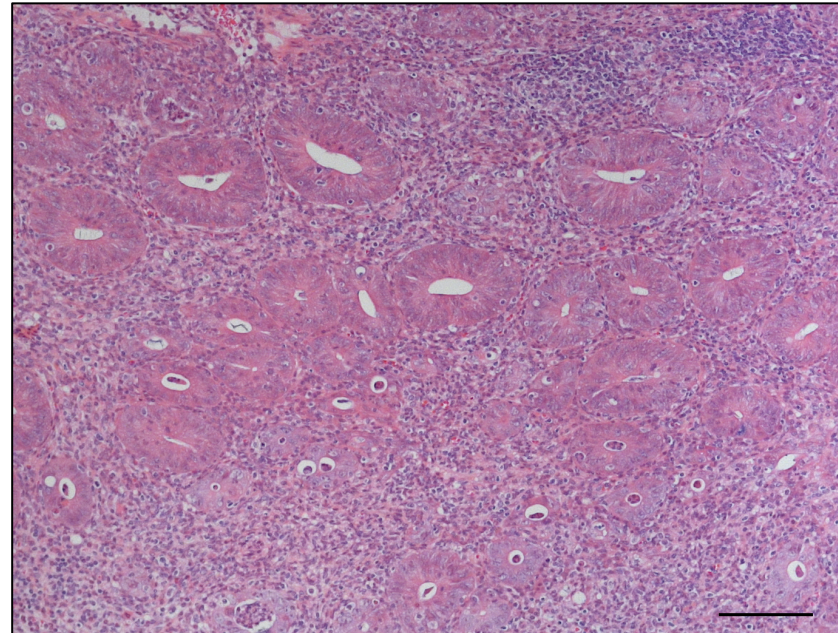



**B**

## Apoptotic Cells (Casp3+) - COLON

**Mock  
Murine**

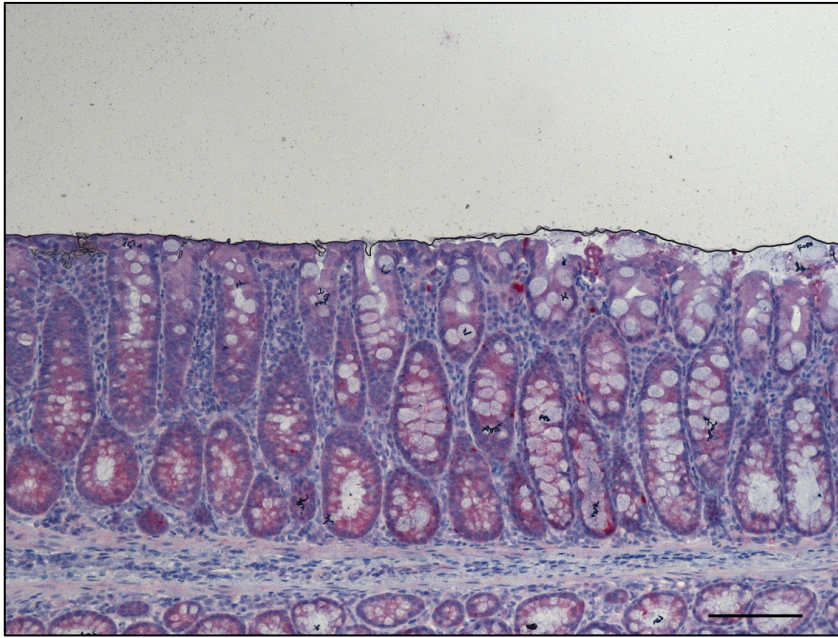

***C. coli*  
Murine**

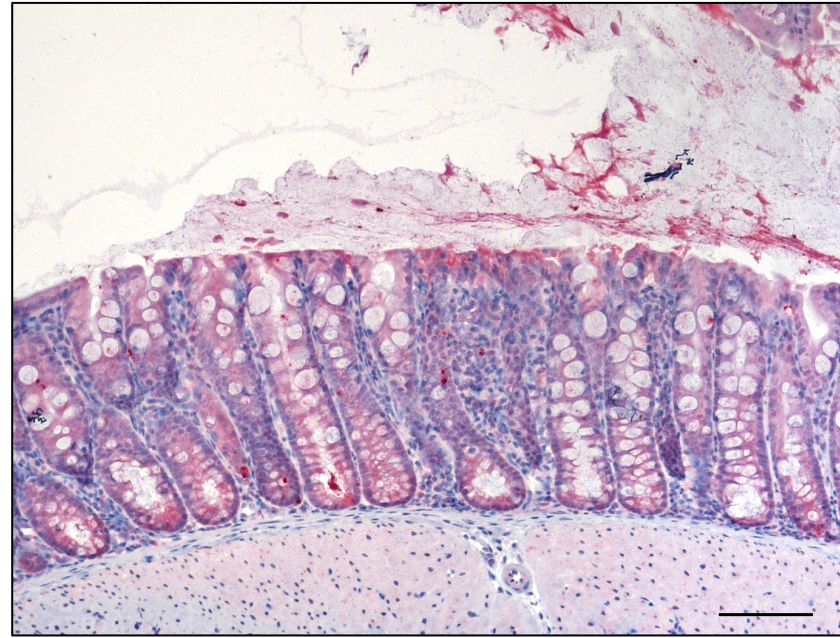

**Mock  
Human**

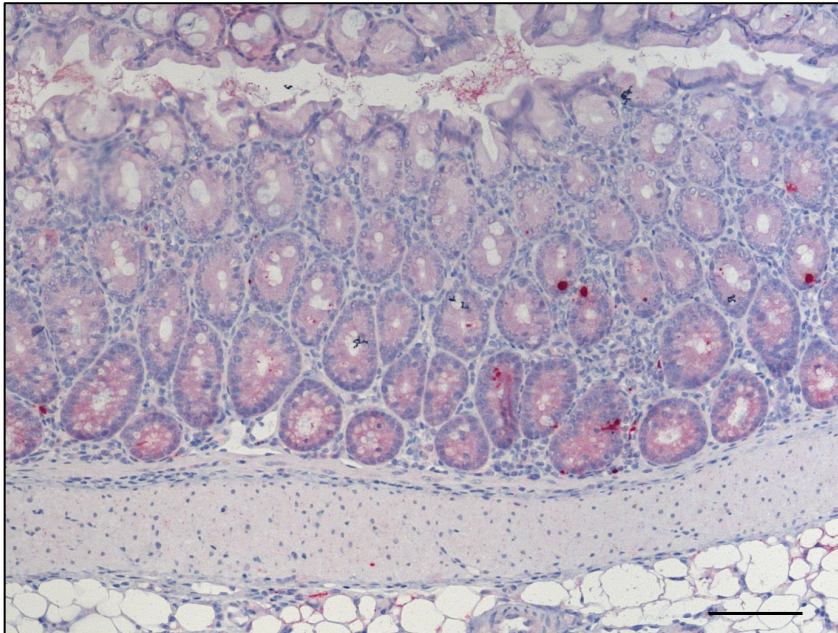

***C. coli*  
Human**

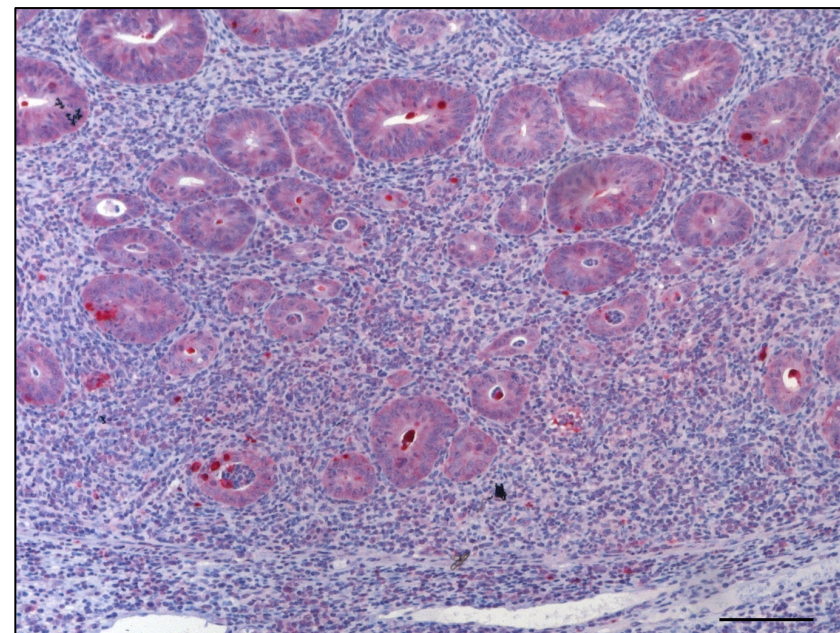



**C**

## Proliferating Cells (Ki67+) - COLON

**Mock  
Murine**

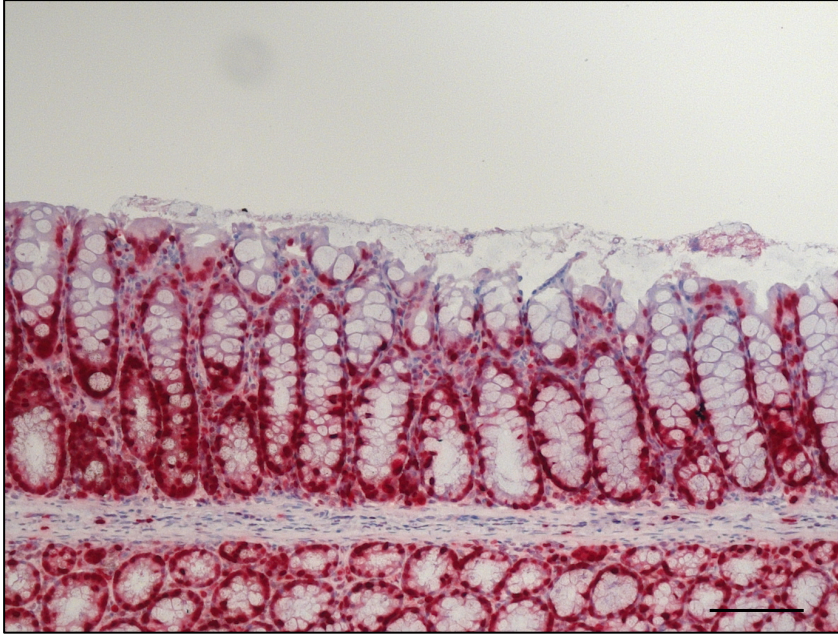

***C. coli*  
Murine**

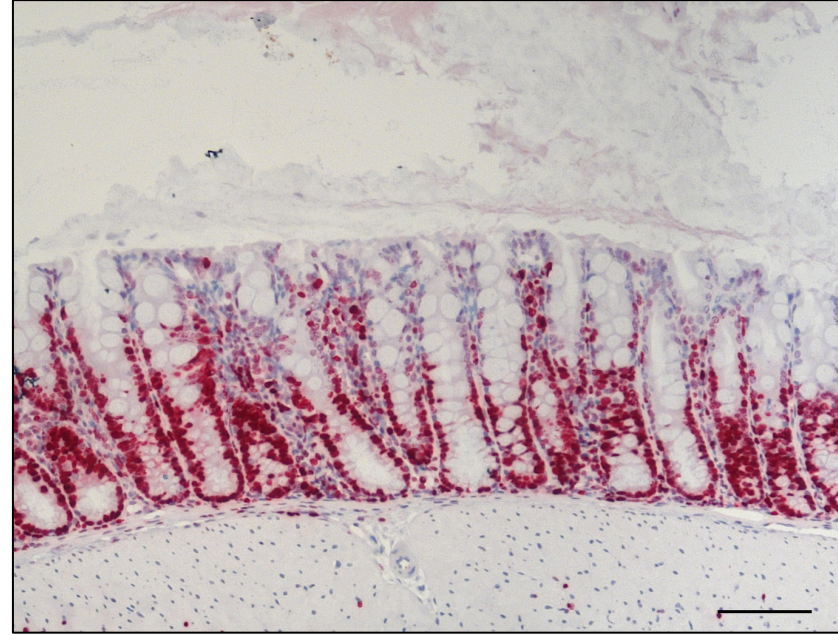

**Mock  
Human**

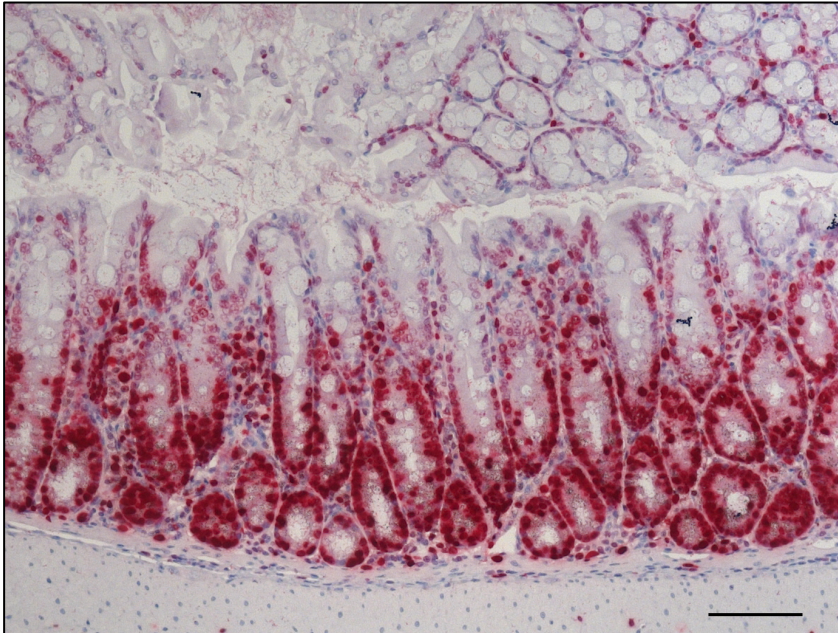

***C. coli*  
Human**

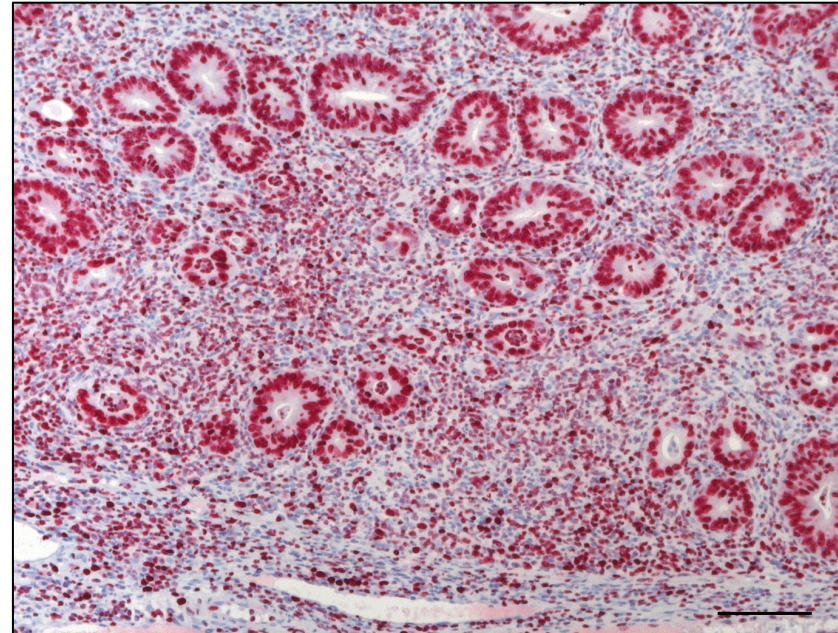



**D**

# Macrophages / Monocytes (F4/80+) - COLON

**Mock  
Murine**

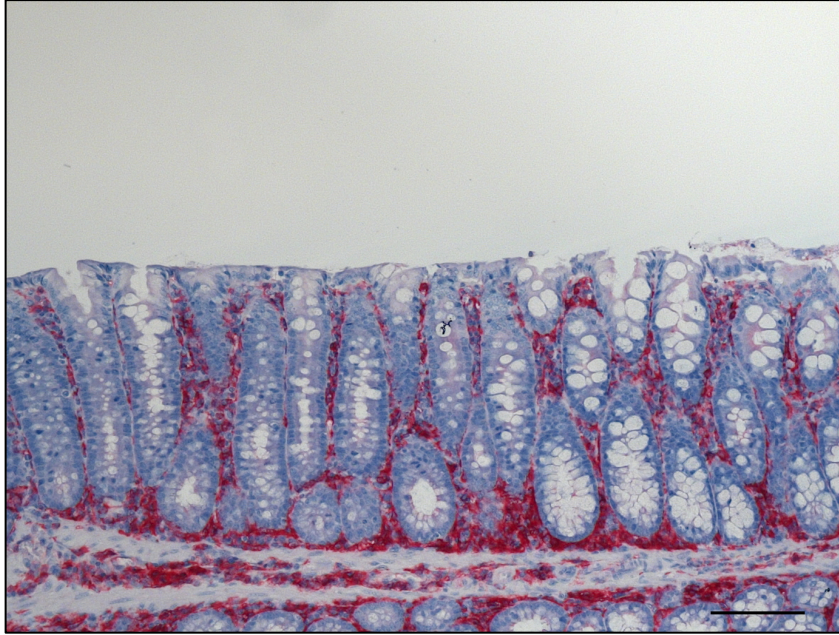

***C. coli*  
Murine**

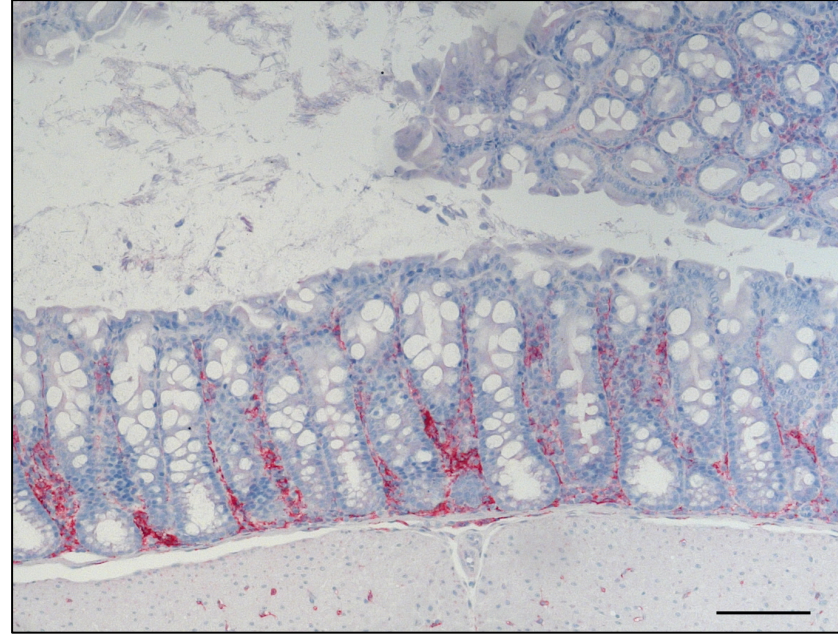

**Mock  
Human**

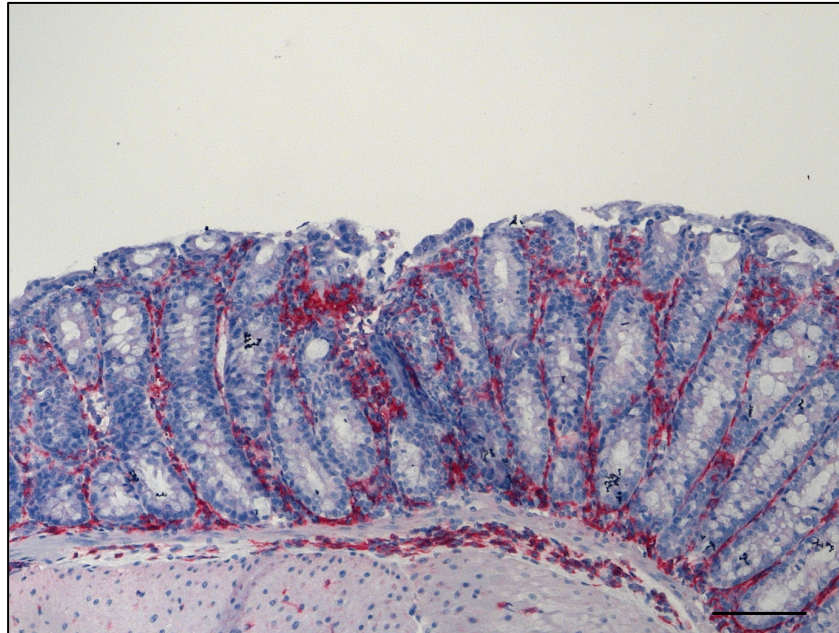

***C. coli*  
Human**

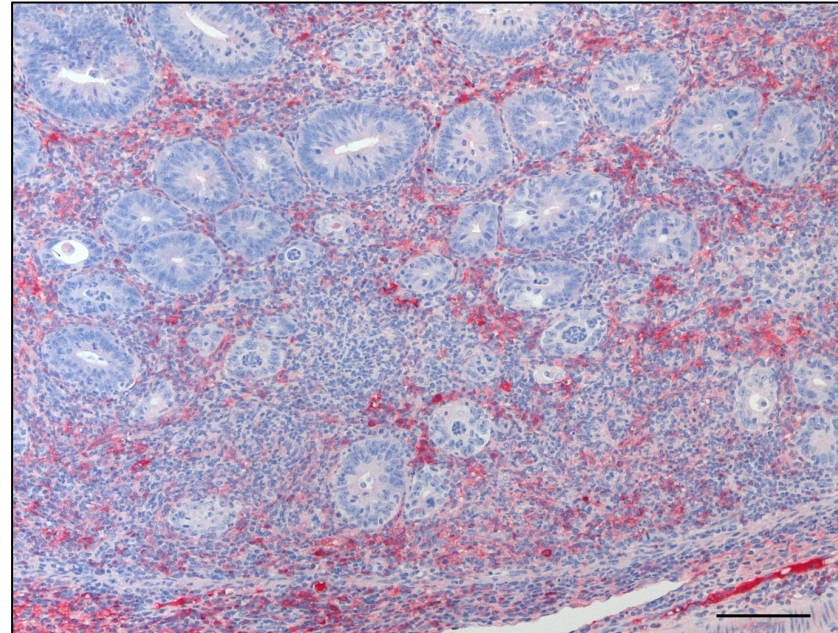



E

## T Lymphocytes (CD3+) - COLON

Mock  
Murine

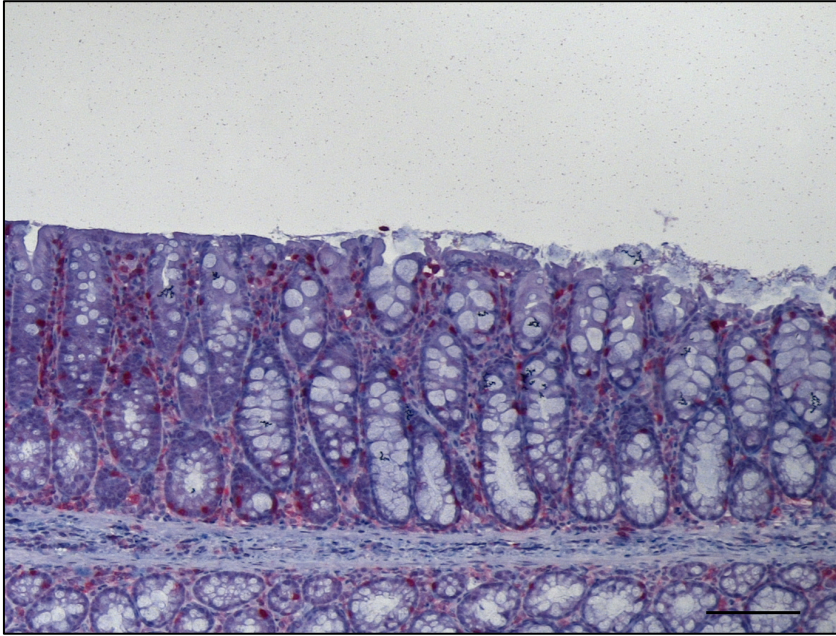

*C. coli*  
Murine

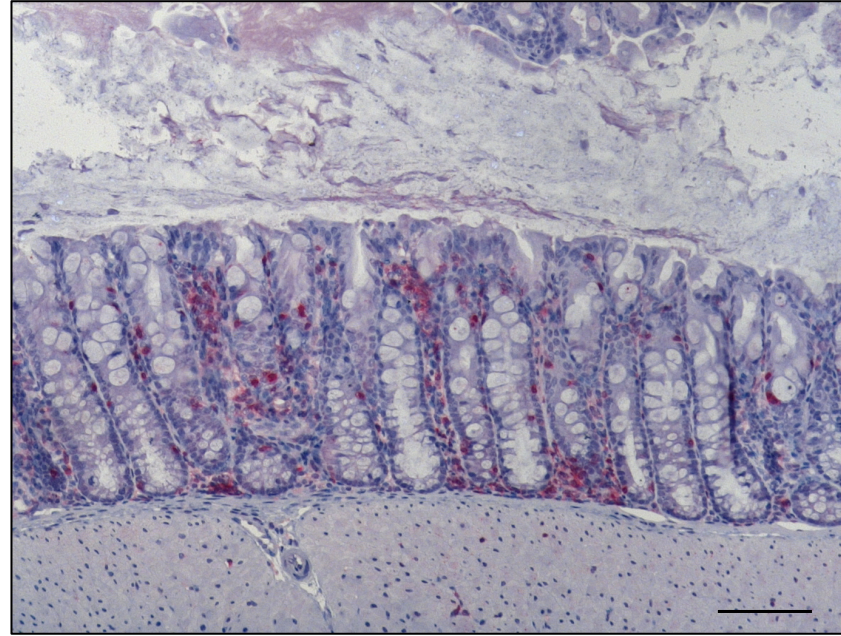

Mock  
Human

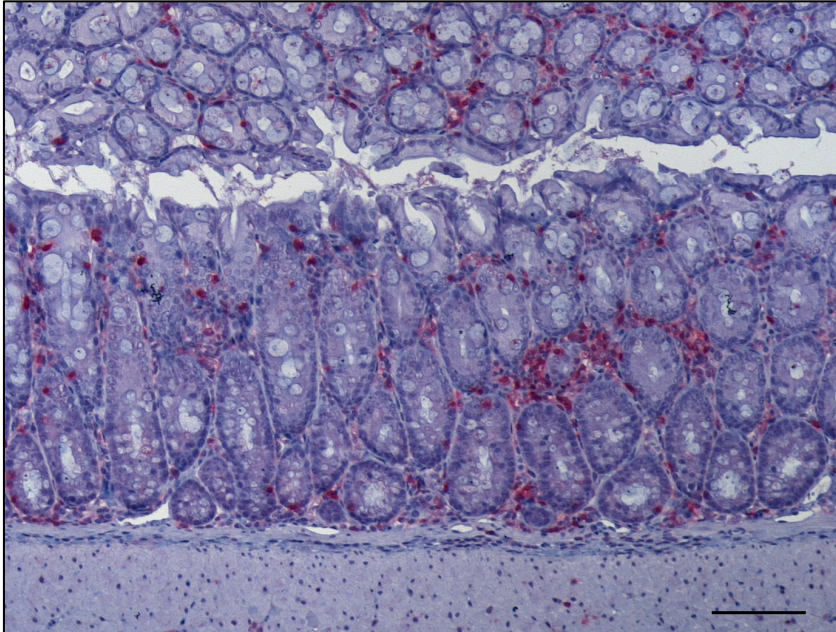

*C. coli*  
Human

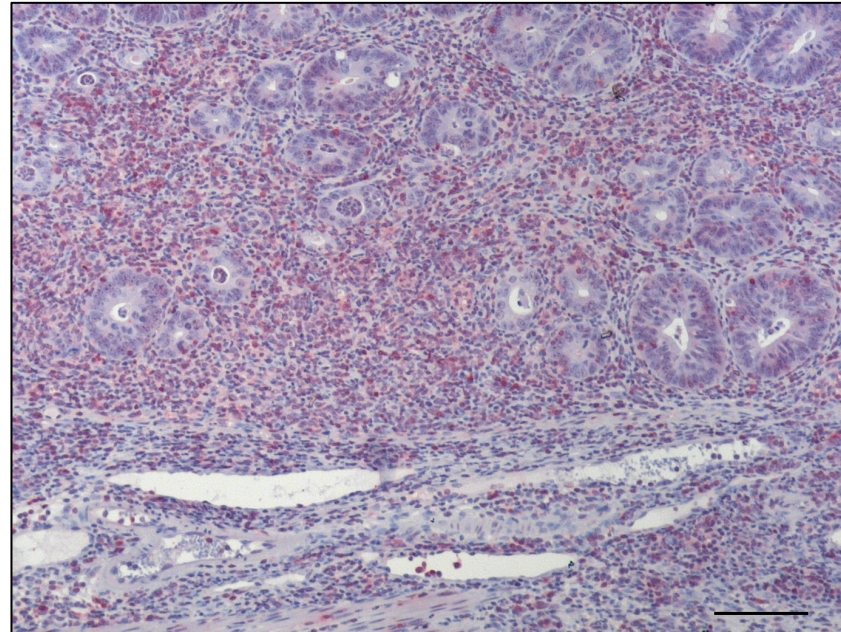



**F**

# Regulatory T Cells (FOXP3+) - COLON

**Mock  
Murine**

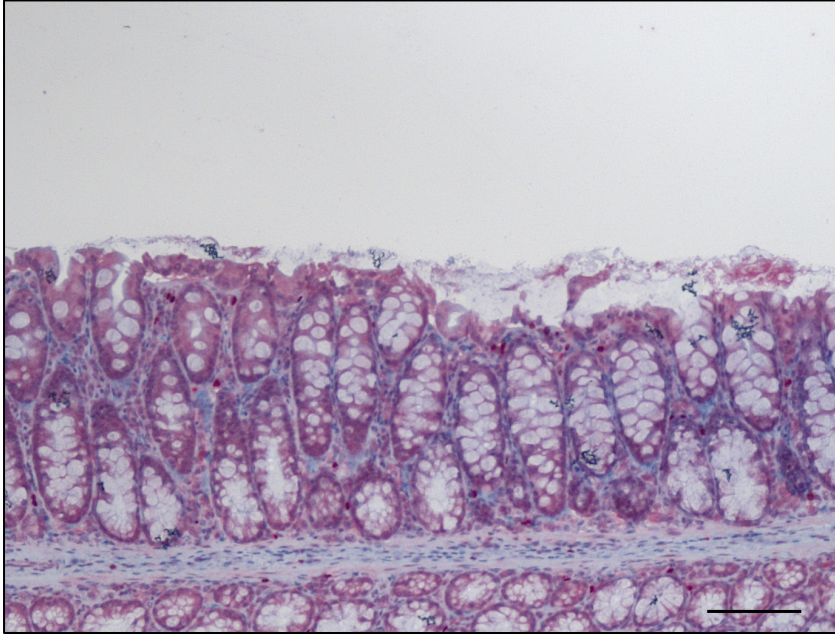

***C. coli*  
Murine**

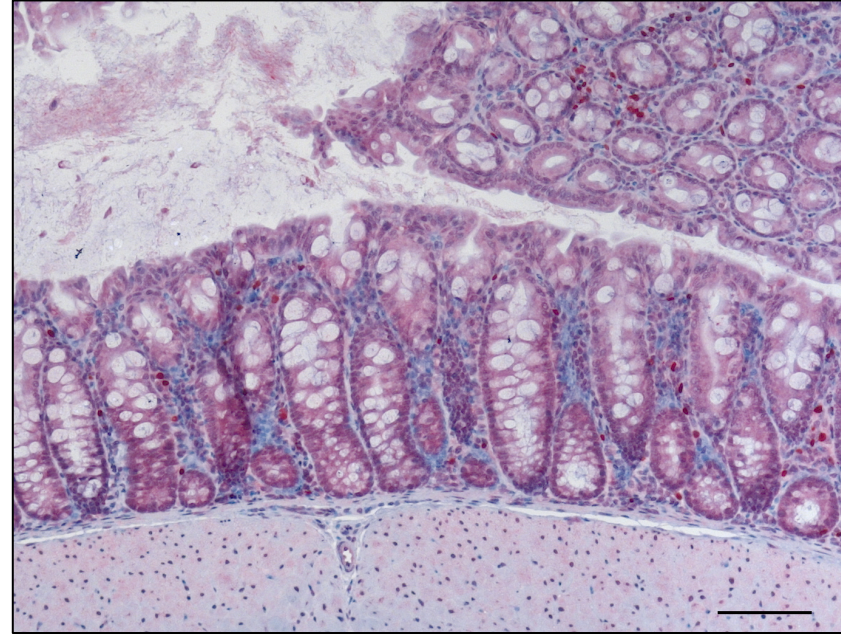

**Mock  
Human**

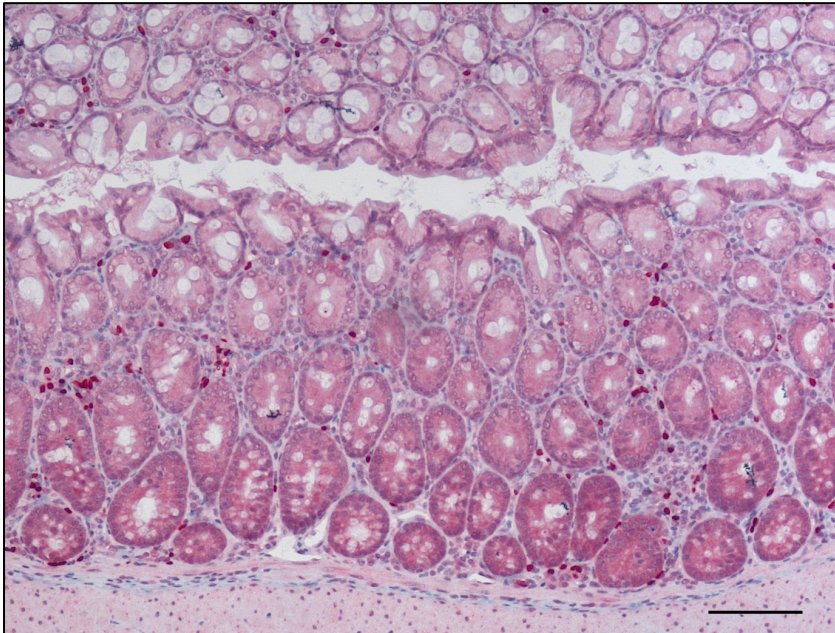

***C. coli*  
Human**

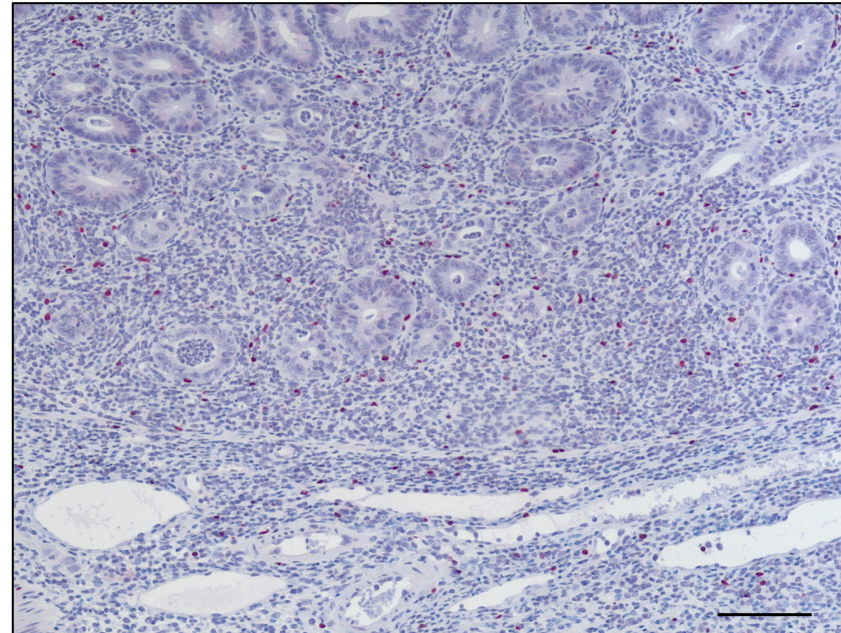



**G**

# B Lymphocytes (B220+) - COLON

**Mock  
Murine**

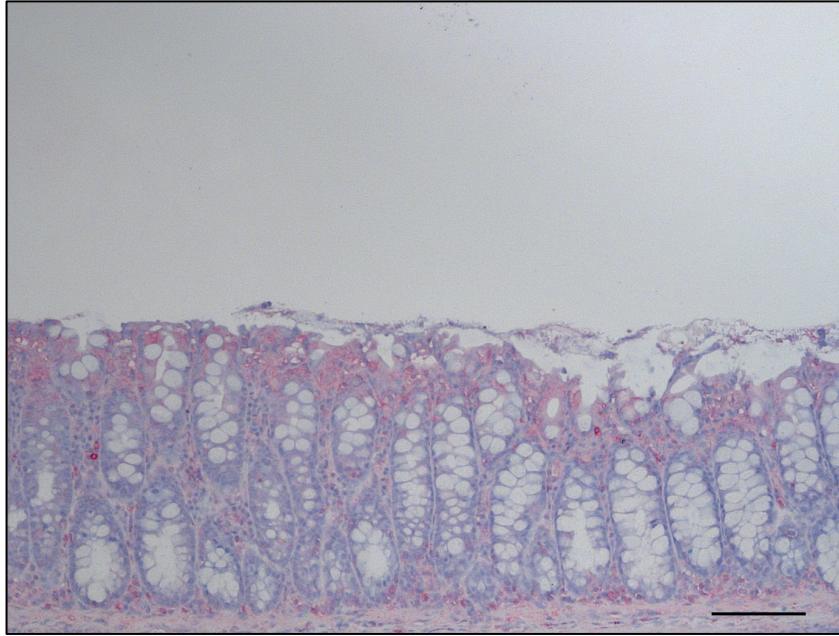

***C. coli*  
Murine**

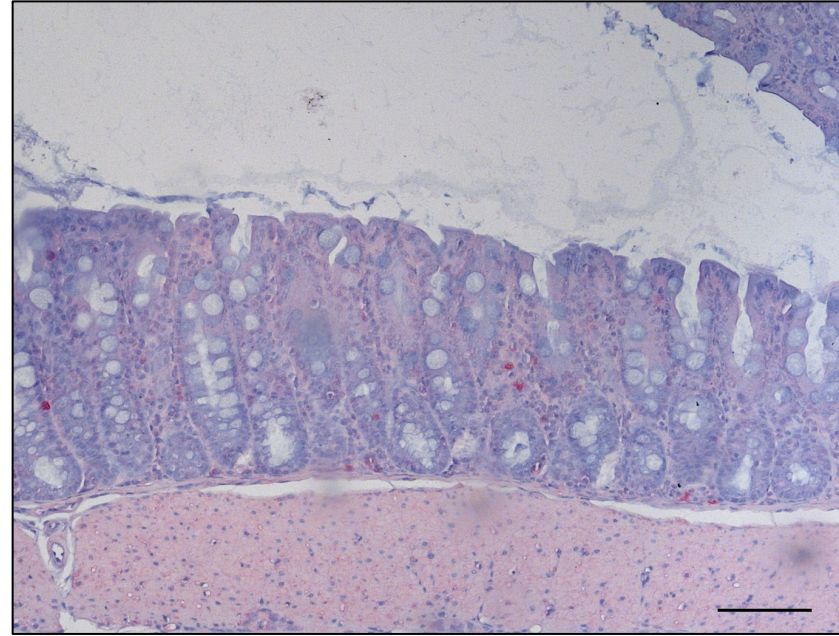

**Mock  
Human**

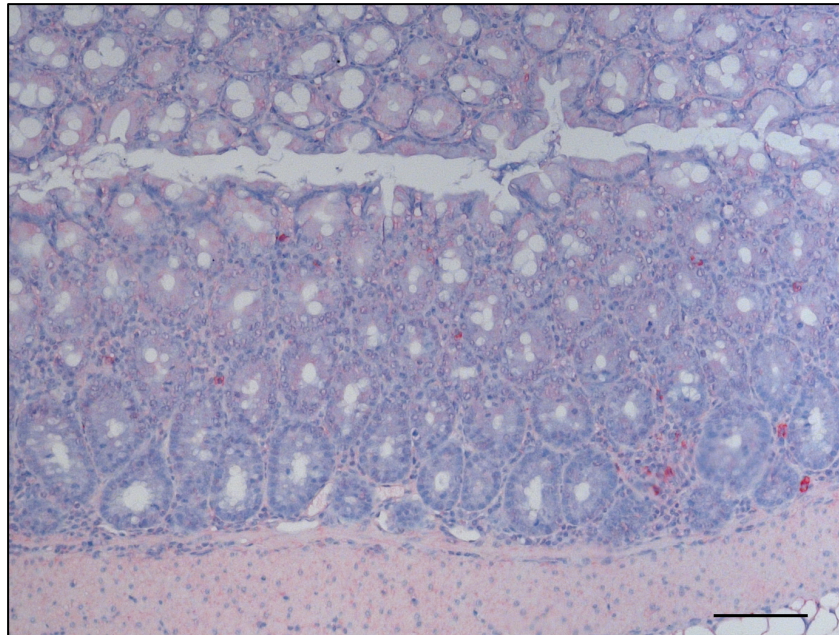

***C. coli*  
Human**

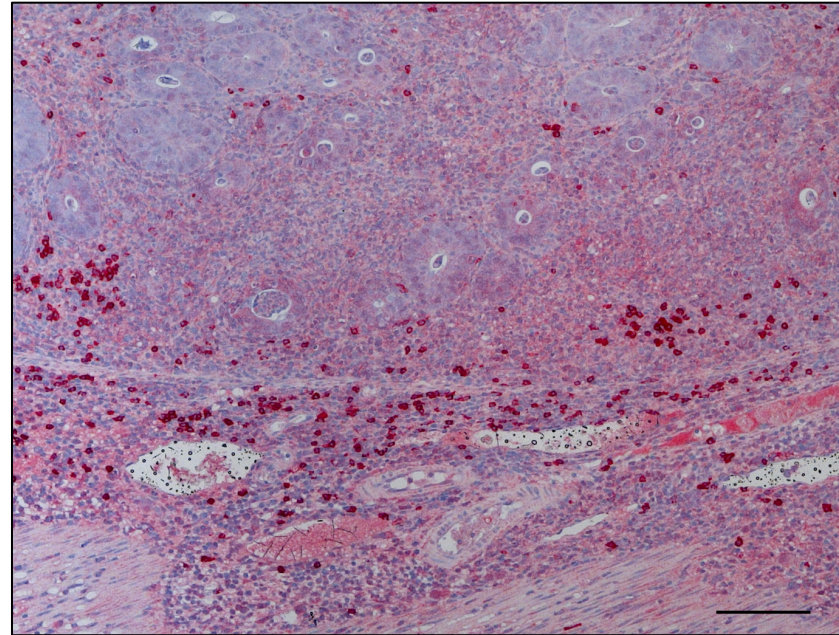

Supplement: s1 [file s1]
