# Supplementary figures and images for: The Host-Specific Intestinal Microbiota Composition Impacts Campylobacter coli Infection in a Clinical Mouse Model of Campylobacteriosis
Source: MDPI journal article supplement (doi:10.3390/pathogens9100804), 2020-09-29

# Experimental Setup

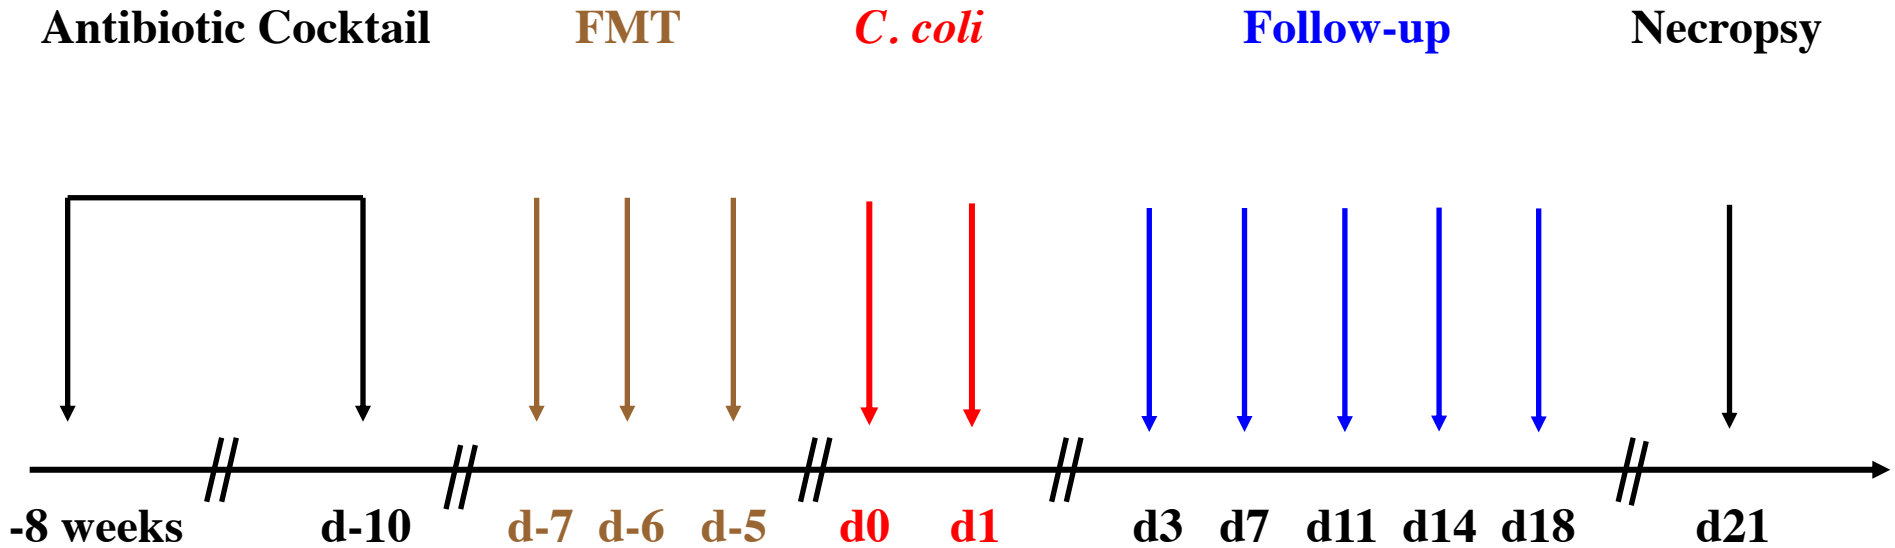

Supplement: s1 [file s1]
